# Supplementary material for: Regulation of spindle integrity and mitotic fidelity by BCCIP
Source: PubMed Central journal article supplement — Oncogene. 2017 Apr 10;36(33):4750–66. doi: 10.1038/onc.2017.92 (PMC5561484; doi:10.1038/onc.2017.92), 2017-04-10

**Supplement S2, three-dimensional reconstruction of the localization of BCCIP to the mother centriole.**

A four-color fluorescent image of a representative interphase cell with BCCIP, EB1,  $\gamma$ -Tubulin, and DNA is depicted. **Movie M1** represents a 3D image of the dissected interphase centrosome, illustrating the preferential localization of BCCIP with the EB1 positive (mother) centriole. **Movie M2** is a typical 3D image of a metaphase cell stained with BCCIP (yellow), spindle (red), and DNA (blue).

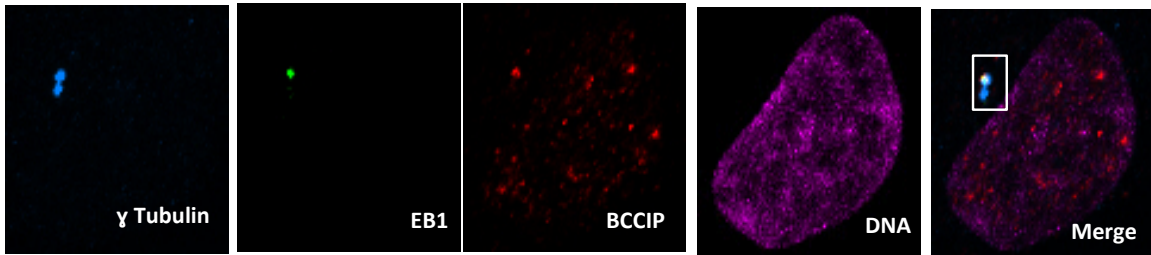

**Movie M1**

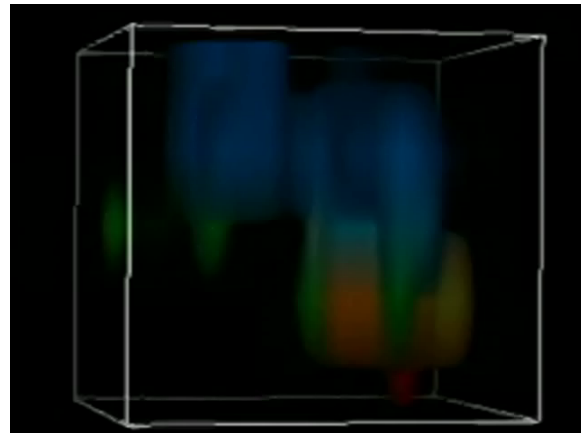

**Movie M2**

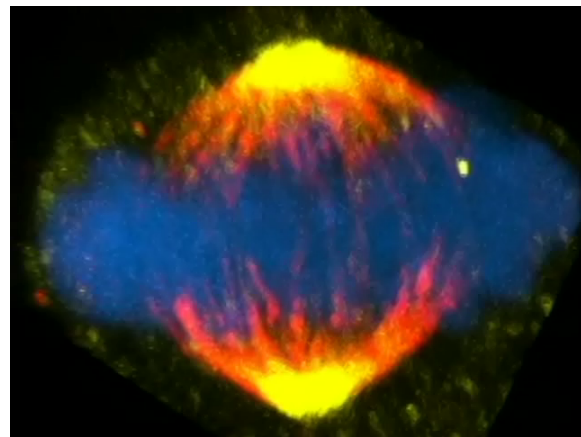

Supplement: NIHMS856829-supplement-2.pdf [file NIHMS856829-supplement-2.pdf]
