# Supplementary material for: Regulation of spindle integrity and mitotic fidelity by BCCIP
Source: PubMed Central journal article supplement — Oncogene. 2017 Apr 10;36(33):4750–66. doi: 10.1038/onc.2017.92 (PMC5561484; doi:10.1038/onc.2017.92), 2017-04-10
Supplement: NIHMS856829-supplement-3.pdf [file NIHMS856829-supplement-3.pdf]

Supplement S3, the aa111-257 domain, as well as proper microtubule flux BCCIP is required for the spindle pole targeting of BCCIP $\alpha$ .

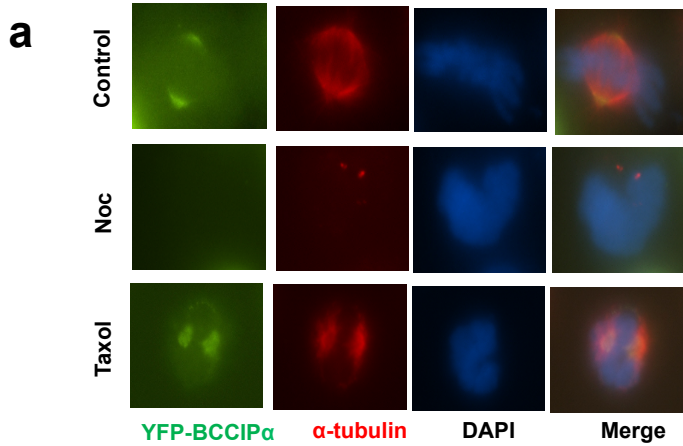

**A: Exogenous YFP-BCCIP $\alpha$  displays the same distribution changes as endogenous BCCIP upon spindle poison treatment.** YFP-BCCIP $\alpha$  expressing HT1080 cells were treated with nocodazole or taxol and stained for  $\alpha$ -tubulin as in **Figure 3A**.

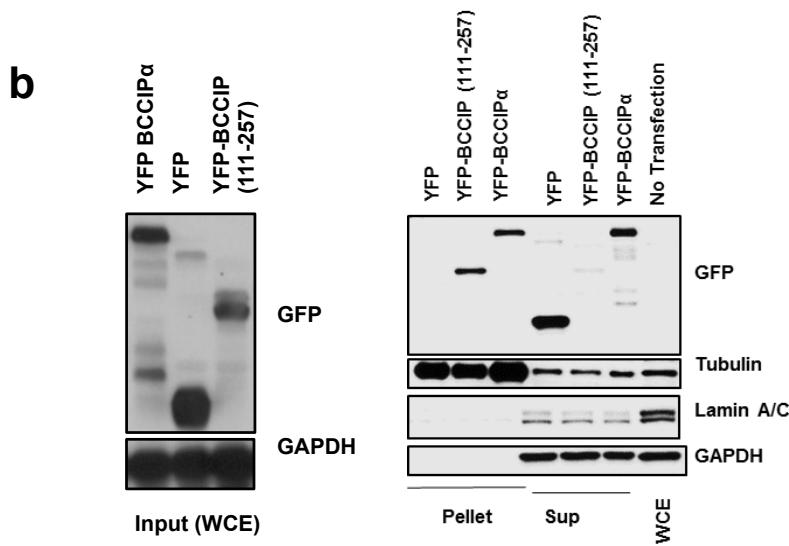

**B: BCCIP 111-257 binds to microtubules.** YFP, YFP-BCCIP $\alpha$ , or YFP-BCCIP (aa111-257) were expressed in Cos7 cells and the molecular weights of these fragments were confirmed by Western blot (left panel). The cell supernatants were processed as in

**Figure 3B** and probed with the indicated antibodies. The right panel demonstrates the majority of the soluble YFP-BCCIP (111-257) fragment (while only a portion of the

full-length YFP-BCCIP $\alpha$ ) was co-precipitated with the microtubules after re-polymerization. WCE = whole cell extract.
