# Supplementary material for: Regulation of spindle integrity and mitotic fidelity by BCCIP
Source: PubMed Central journal article supplement — Oncogene. 2017 Apr 10;36(33):4750–66. doi: 10.1038/onc.2017.92 (PMC5561484; doi:10.1038/onc.2017.92), 2017-04-10
Supplement: NIHMS856829-supplement-4.pdf [file NIHMS856829-supplement-4.pdf]

**Supplement S4. Representative images of acetylated-tubulin staining in BCCIP knockdown cells that express RNAi-resistant BCCIP.**

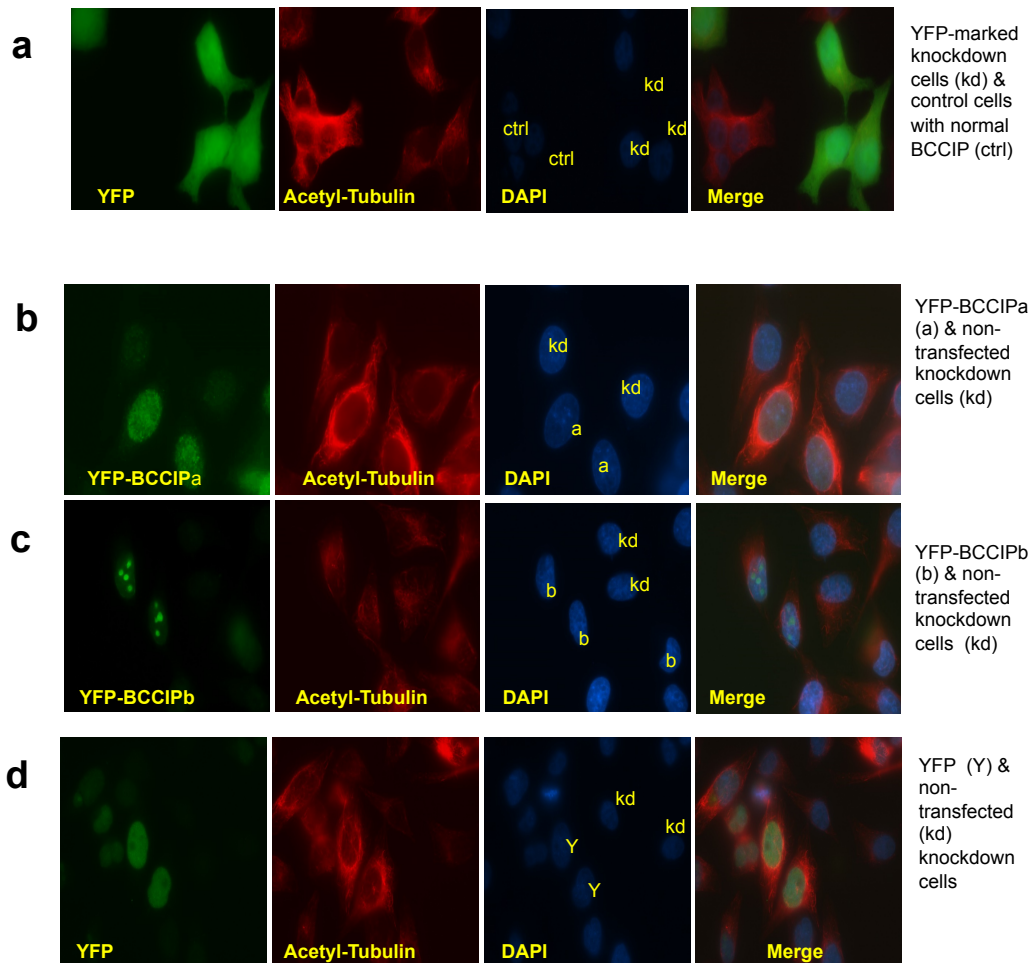

To eliminate any potential bias when comparing staining intensity between two cell types, mixtures of BCCIP proficient and BCCIP-deficient cells marked by differential YFP status were used to assess acetyl-tubulin staining.

**A:** Control cells (GFP-negative) were co-seeded with BCCIP knockdown cells (GFP-positive), and stained for acetyl-tubulin. The knockdown cells can be easily distinguished from control cells due to the expression of GFP.

**B, C, & D:** YFP-negative BCCIP knockdown HeLa cells were stably transduced with YFP-BCCIP $\alpha$  (**S4B**), YFP-BCCIP $\beta$  (**S4C**), or YFP (**S4D**), co-seeded with BCCIP-knockdown cells (GFP-negative), fixed and probed with anti-acetyl tubulin. Note that after extraction, YFP-BCCIP $\beta$  positive cells can be identified by the retention of YFP-BCCIP $\beta$  in the nucleolus while YFP-BCCIP $\alpha$  can be visualized by nuclear staining. BCCIP re-expressing cells can be distinguished from YFP-negative (BCCIP knockdown) cells in the case of YFP-BCCIP $\alpha$ / $\beta$  rescue (**S4B and S4C**), or GFP-control cells in the case of BCCIP-knockdown cells expressing GFP reporter construct (**S4D**).
