# Supplementary material for: Regulation of spindle integrity and mitotic fidelity by BCCIP
Source: PubMed Central journal article supplement — Oncogene. 2017 Apr 10;36(33):4750–66. doi: 10.1038/onc.2017.92 (PMC5561484; doi:10.1038/onc.2017.92), 2017-04-10
Supplement: NIHMS856829-supplement-5.pdf [file NIHMS856829-supplement-5.pdf]

## Supplement S5. Spindle tilt defects in BCCIP deficient cells.

Three-dimensional films are reconstructed from a set of confocal Z-stacks of cells grown parallel to the cell culture surface. Representative 3D spindle images of control (**Supplement Movies M3**) and BCCIP knockdown (**Supplement Movies M4**) cells are shown. In a separate experiment, GFP-negative BCCIP knockdown cells were transfected with YFP-BCCIP $\alpha$  (**Supplement Movies M5**), YFP-BCCIP $\beta$  (**Supplement Movies M6**), and YFP (**Supplement Movies M7**). Shown are representative images of the both BCCIP knockdown (YFP-negative) and BCCIP expressing (YFP-positive) cells on the same viewing field. BCCIP $\alpha$  expression restores spindle orientation in BCCIP-KD cells, but this rescue is not observed during BCCIP $\beta$  and control re-expression.

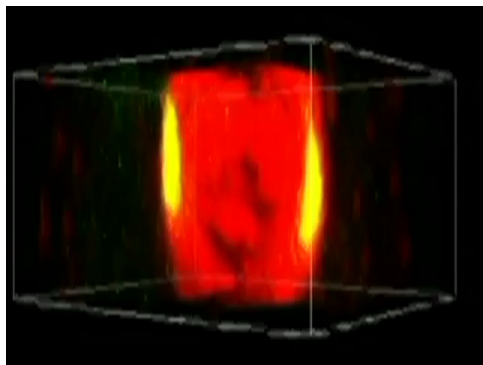

Movie M3 (control cells)

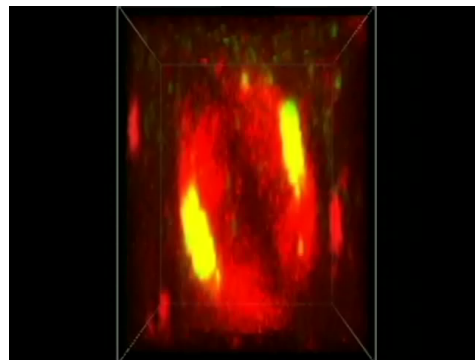

Movie M4 (BCCIP knockdown cells)

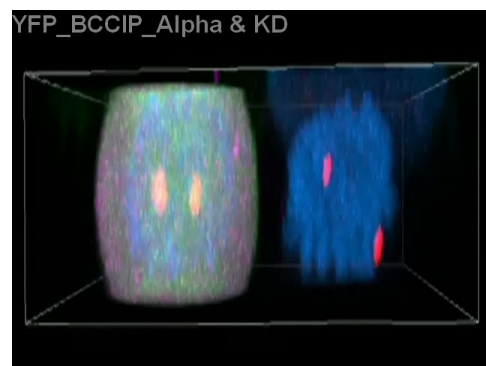

Movie M5:  
BCCIP-KD (cell on the right)  
BCCIP-KD + YFP-BCCIP $\alpha$  (cell on the left)

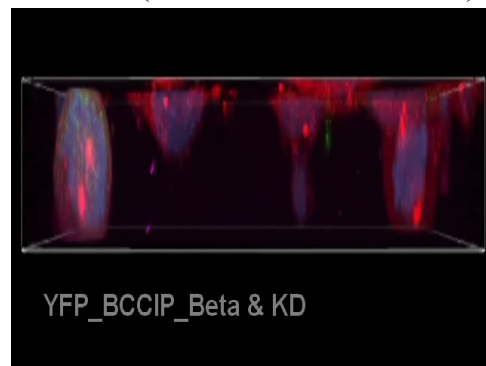

Movie M6  
BCCIP-KD (cell on the right)  
BCCIP-KD + YFP-BCCIP $\beta$  (cell on the left)

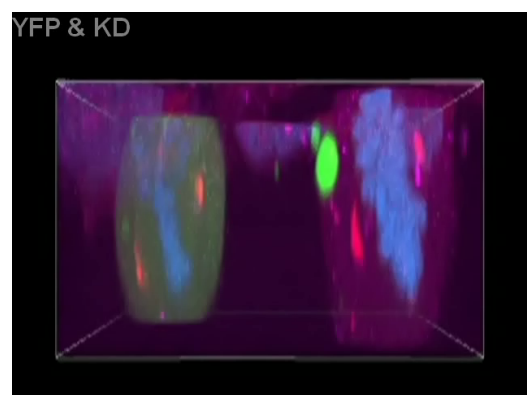

Movie M7:  
BCCIP-KD (cell on the right)  
BCCIP-KD + YFP (cell on the left)
