# Supplementary material for: Regulation of spindle integrity and mitotic fidelity by BCCIP
Source: PubMed Central journal article supplement — Oncogene. 2017 Apr 10;36(33):4750–66. doi: 10.1038/onc.2017.92 (PMC5561484; doi:10.1038/onc.2017.92), 2017-04-10
Supplement: NIHMS856829-supplement-8.pdf [file NIHMS856829-supplement-8.pdf]

**Supplement S8: Representative time-lapse video images of mitotic progression GFP-Tubulin tagged cells.**

**Movie 8A (control)**

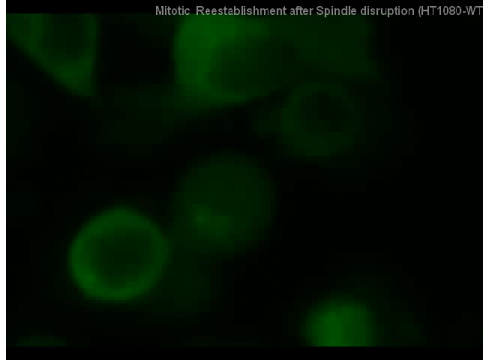

**Movie 8B (BCCIP-KD)**

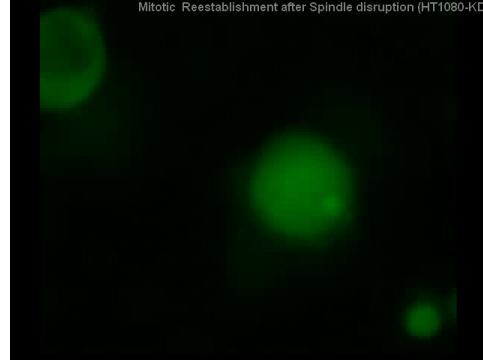

**M8:** Duration required to complete mitosis after overnight nocodazole treatment and cold shock in wild type HT1080 cells (Supplement Movie M8A) and HT1080 BCCIP knockdown cells (Supplement Movie M8B)

**Movie 9A (control)**

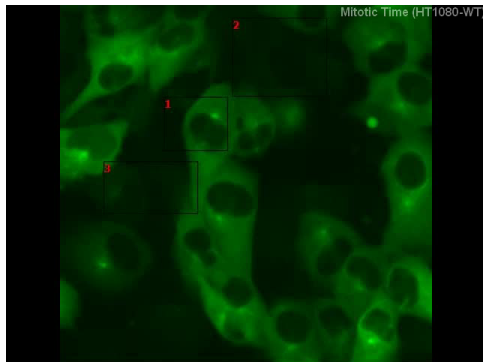

**Movie 9B (BCCIP-KD)**

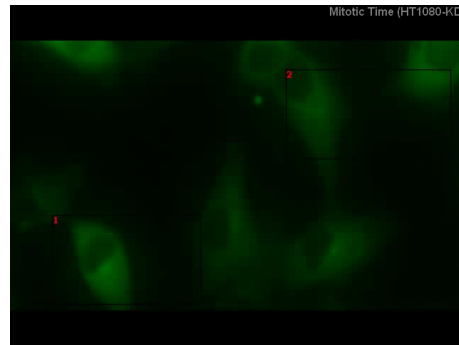

**M9:** Duration from the onset of mitosis to the completion of cell division (presence of a mid-body) in wild type (Supplement Movie M9A) and BCCIP knockdown HT1080 cells (Supplement Movie M9B).
